# Supplementary material for: Ship rats and island reptiles: patterns of co-existence in the Mediterranean
Source: PeerJ. 2020 Mar 19;8:e8821. doi: 10.7717/peerj.8821 (PMC7085892; doi:10.7717/peerj.8821)
Supplement: Supplemental Information 1 [file peerj-08-8821-s001.xlsx]

## Sheet: Sheet1
	lat	lon	REGION	MODEL	MODEL	MODEL	MODEL	MODEL	MODEL	MODEL	RAT	area	log(area)	Euleptes europaea	Podarcis tiliguerta	Tarentola mauritanica	Hemidactylus turcicus	Podarcis lilfordi	Podarcis pityusensis	Hierophis viridiflavus	Podarcis muralis	Chalcides ocellatus	Podarcis siculus	Algyroides fitzingeri	Archaeolacerta bedriagae
Majorca	39.6589	3.03197	GYM	PLIvsRAT			PSIvsRAT	HTUvsRAT	TMAvsRAT		1	3640	8.19974	0	0	1	1	0	0	0	0	0	1	0	0
Menorca	39.9691	4.04701	GYM	PLIvsRAT			PSIvsRAT	HTUvsRAT	TMAvsRAT		1	696.7	6.54635	0	0	1	1	0	0	0	0	0	1	0	0
Nitja	40.0927	4.07518	GYM	PLIvsRAT			PSIvsRAT	HTUvsRAT	TMAvsRAT		0	0.0825	-2.49496	0	0	0	0	1	0	0	0	0	0	0	0
Bledes	40.0681	4.03138	GYM	PLIvsRAT			PSIvsRAT	HTUvsRAT	TMAvsRAT		1	0.0375	-3.28341	0	0	0	0	1	0	0	0	0	0	0	0
Sargantana	40.0466	4.13643	GYM	PLIvsRAT			PSIvsRAT	HTUvsRAT	TMAvsRAT		1	0.0257	-3.66126	0	0	0	0	1	0	0	0	0	0	0	0
Addaia Gran	40.0168	4.21077	GYM	PLIvsRAT			PSIvsRAT	HTUvsRAT	TMAvsRAT		0	0.084	-2.47694	0	0	0	1	1	0	0	0	0	0	0	0
d'en Colom	39.9598	4.27945	GYM	PLIvsRAT			PSIvsRAT	HTUvsRAT	TMAvsRAT		1	0.63	-0.462035	0	0	1	0	1	0	0	0	0	0	0	0
Alcanada	39.8355	3.17055	GYM	PLIvsRAT			PSIvsRAT	HTUvsRAT	TMAvsRAT		1	0.022	-3.81671	0	0	1	0	0	0	0	0	0	0	0	0
de l'Aire	39.8012	4.2915	GYM	PLIvsRAT			PSIvsRAT	HTUvsRAT	TMAvsRAT		1	0.32	-1.13943	0	0	0	0	1	0	0	0	0	0	0	0
Sa Dragonera	39.5844	2.31346	GYM	PLIvsRAT			PSIvsRAT	HTUvsRAT	TMAvsRAT		1	2.97	1.08856	0	0	1	0	1	0	0	0	0	0	0	0
Pantaleu	39.5769	2.34779	GYM	PLIvsRAT			PSIvsRAT	HTUvsRAT	TMAvsRAT		1	0.025	-3.68888	0	0	1	0	0	0	0	0	0	0	0	0
Sa Porrasa	39.5037	2.54538	GYM	PLIvsRAT			PSIvsRAT	HTUvsRAT	TMAvsRAT		1	0.05	-2.99573	0	0	1	0	0	0	0	0	0	0	0	0
Conills (Calvià)	39.5023	2.45579	GYM	PLIvsRAT			PSIvsRAT	HTUvsRAT	TMAvsRAT		1	0.011	-4.50986	0	0	1	0	1	0	0	0	0	0	0	0
Malgrats	39.4983	2.45005	GYM	PLIvsRAT			PSIvsRAT	HTUvsRAT	TMAvsRAT		1	0.09	-2.40795	0	0	1	0	1	0	0	0	0	0	0	0
Toro	39.4623	2.47174	GYM	PLIvsRAT			PSIvsRAT	HTUvsRAT	TMAvsRAT		0	0.0063	-5.06721	0	0	0	1	1	0	0	0	0	0	0	0
Guardis	39.3104	3.00129	GYM	PLIvsRAT			PSIvsRAT	HTUvsRAT	TMAvsRAT		0	0.025	-3.68888	0	0	1	0	1	0	0	0	0	0	0	0
Moltona	39.3043	3.01064	GYM	PLIvsRAT			PSIvsRAT	HTUvsRAT	TMAvsRAT		0	0.06	-2.81341	0	0	1	0	1	0	0	0	0	0	0	0
Na Foradada	39.2067	2.97911	GYM	PLIvsRAT			PSIvsRAT	HTUvsRAT	TMAvsRAT		0	0.016	-4.13517	0	0	0	0	1	0	0	0	0	0	0	0
Na Pobra	39.2003	2.97341	GYM	PLIvsRAT			PSIvsRAT	HTUvsRAT	TMAvsRAT		0	0.029	-3.54046	0	0	0	0	1	0	0	0	0	0	0	0
Plana (Cabrera)	39.1964	2.97307	GYM	PLIvsRAT			PSIvsRAT	HTUvsRAT	TMAvsRAT		0	0.056	-2.8824	0	0	1	0	1	0	0	0	0	0	0	0
Esponja	39.1951	2.96545	GYM	PLIvsRAT			PSIvsRAT	HTUvsRAT	TMAvsRAT		0	0.0044	-5.42615	0	0	0	0	1	0	0	0	0	0	0	0
dels Conills	39.1843	2.96345	GYM	PLIvsRAT			PSIvsRAT	HTUvsRAT	TMAvsRAT		1	1.44	0.364643	0	0	1	0	1	0	0	0	0	0	0	0
Redona (Cabrera)	39.1675	2.97677	GYM	PLIvsRAT			PSIvsRAT	HTUvsRAT	TMAvsRAT		1	0.107	-2.23493	0	0	0	0	1	0	0	0	0	0	0	0
Fonoll	39.1483	2.96377	GYM	PLIvsRAT			PSIvsRAT	HTUvsRAT	TMAvsRAT		0	0.0037	-5.59942	0	0	0	0	1	0	0	0	0	0	0	0
Ses Bledes	39.1385	2.96192	GYM	PLIvsRAT			PSIvsRAT	HTUvsRAT	TMAvsRAT		0	0.0053	-5.24005	0	0	0	0	1	0	0	0	0	0	0	0
Cabrera	39.1381	2.94428	GYM	PLIvsRAT			PSIvsRAT	HTUvsRAT	TMAvsRAT		1	15.7	2.75366	0	0	1	1	1	0	0	0	0	0	0	0
Ses Rates	39.1327	2.92315	GYM	PLIvsRAT			PSIvsRAT	HTUvsRAT	TMAvsRAT		0	0.0039	-5.54678	0	0	0	0	1	0	0	0	0	0	0	0
Teula	39.1258	2.9431	GYM	PLIvsRAT			PSIvsRAT	HTUvsRAT	TMAvsRAT		0	0.0058	-5.1499	0	0	0	0	1	0	0	0	0	0	0	0
Imperial (Cabrera)	39.1254	2.95912	GYM	PLIvsRAT			PSIvsRAT	HTUvsRAT	TMAvsRAT		1	0.03	-3.50656	0	0	1	0	1	0	0	0	0	0	0	0
Estel Xapat	39.1253	2.93947	GYM	PLIvsRAT			PSIvsRAT	HTUvsRAT	TMAvsRAT		0	0.01	-4.60517	0	0	0	0	1	0	0	0	0	0	0	0
Dos Colls	39.122	2.93596	GYM	PLIvsRAT			PSIvsRAT	HTUvsRAT	TMAvsRAT		0	0.00315	-5.76035	0	0	0	0	1	0	0	0	0	0	0	0
Fora	39.1209	2.94021	GYM	PLIvsRAT			PSIvsRAT	HTUvsRAT	TMAvsRAT		0	0.0017	-6.37713	0	0	0	0	1	0	0	0	0	0	0	0
S'Espardell	38.7972	1.47682	PIT	PPIvsRAT				HTUvsRAT	TMAvsRAT		0	0.56	-0.579818	0	0	0	0	0	1	0	0	0	0	0	0
Porcs	38.7989	1.42265	PIT	PPIvsRAT				HTUvsRAT	TMAvsRAT		0	0.0125	-4.38203	0	0	0	0	0	1	0	0	0	0	0	0
Negra Grossa	38.8161	1.40381	PIT	PPIvsRAT				HTUvsRAT	TMAvsRAT		0	0.013	-4.34281	0	0	1	0	0	1	0	0	0	0	0	0
Es Penjats	38.8164	1.41063	PIT	PPIvsRAT				HTUvsRAT	TMAvsRAT		0	0.08	-2.52573	0	0	1	0	0	1	0	0	0	0	0	0
Caragoler	38.8269	1.40745	PIT	PPIvsRAT				HTUvsRAT	TMAvsRAT		0	0.0025	-5.99146	0	0	0	0	0	1	0	0	0	0	0	0
Hort	38.8899	1.21886	PIT	PPIvsRAT				HTUvsRAT	TMAvsRAT		0	0.003	-5.80914	0	0	0	0	0	1	0	0	0	0	0	0
S'Espartar	38.9589	1.19485	PIT	PPIvsRAT				HTUvsRAT	TMAvsRAT		0	0.22	-1.51413	0	0	1	0	0	1	0	0	0	0	0	0
Na Gorra	38.9681	1.16548	PIT	PPIvsRAT				HTUvsRAT	TMAvsRAT		0	0.016	-4.13517	0	0	0	0	0	1	0	0	0	0	0	0
Na Bosc	38.9723	1.16578	PIT	PPIvsRAT				HTUvsRAT	TMAvsRAT		0	0.031	-3.47377	0	0	0	1	0	1	0	0	0	0	0	0
Margalida	39.0496	1.31517	PIT	PPIvsRAT				HTUvsRAT	TMAvsRAT		0	0.014	-4.2687	0	0	0	0	0	1	0	0	0	0	0	0
Formentera	38.697	1.42368	PIT	PPIvsRAT				HTUvsRAT	TMAvsRAT		1	83	4.41884	0	0	1	1	0	1	0	0	0	0	0	0
Redona (des Conills)	38.7512	1.43117	PIT	PPIvsRAT				HTUvsRAT	TMAvsRAT		1	0.005	-5.29832	0	0	0	0	0	1	0	0	0	0	0	0
Pouet	38.7539	1.43049	PIT	PPIvsRAT				HTUvsRAT	TMAvsRAT		1	0.011	-4.50986	0	0	0	0	0	1	0	0	0	0	0	0
Gastabi	38.7741	1.41694	PIT	PPIvsRAT				HTUvsRAT	TMAvsRAT		1	0.013	-4.34281	0	0	0	0	0	1	0	0	0	0	0	0
S'Espalmador	38.7849	1.42537	PIT	PPIvsRAT				HTUvsRAT	TMAvsRAT		1	1.5	0.405465	0	0	0	1	0	1	0	0	0	0	0	0
Es Vedrà	38.8666	1.19784	PIT	PPIvsRAT				HTUvsRAT	TMAvsRAT		1	0.72	-0.328504	0	0	0	0	0	1	0	0	0	0	0	0
Vedranell	38.868	1.21145	PIT	PPIvsRAT				HTUvsRAT	TMAvsRAT		1	0.19	-1.66073	0	0	0	0	0	1	0	0	0	0	0	0
Sal Rosa	38.8717	1.40619	PIT	PPIvsRAT				HTUvsRAT	TMAvsRAT		1	0.0088	-4.733	0	0	0	0	0	1	0	0	0	0	0	0
Ses Rates	38.8964	1.42313	PIT	PPIvsRAT				HTUvsRAT	TMAvsRAT		1	0.01	-4.60517	0	0	0	0	0	1	0	0	0	0	0	0
Bosc	38.9688	1.21707	PIT	PPIvsRAT				HTUvsRAT	TMAvsRAT		1	0.18	-1.7148	0	0	0	0	0	1	0	0	0	0	0	0
Na Plana (Bledes)	38.9794	1.16005	PIT	PPIvsRAT				HTUvsRAT	TMAvsRAT		1	0.031	-3.47377	0	0	0	1	0	1	0	0	0	0	0	0
Sa Conillera	38.986	1.21098	PIT	PPIvsRAT				HTUvsRAT	TMAvsRAT		1	1.17	0.157004	0	0	0	1	0	1	0	0	0	0	0	0
Ibiza	39.0067	1.447	PIT	PPIvsRAT				HTUvsRAT	TMAvsRAT		1	577	6.35784	0	0	1	1	0	1	0	0	0	0	0	0
Tagomago	39.036	1.64415	PIT	PPIvsRAT				HTUvsRAT	TMAvsRAT		1	0.65	-0.430783	0	0	0	0	0	1	0	0	0	0	0	0
Sainte-Marguerite	43.5201	7.04727	LIG	EEUvsRAT		PMUvsRAT		HTUvsRAT	TMAvsRAT		1	1.91	0.647103	0	0	1	1	0	0	0	1	0	0	0	0
Saint-Honorat	43.5075	7.04643	LIG	EEUvsRAT		PMUvsRAT		HTUvsRAT	TMAvsRAT		1	0.42	-0.867501	0	0	1	0	0	0	0	1	0	0	0	0
Saint Féréol	43.5063	7.05807	LIG	EEUvsRAT		PMUvsRAT		HTUvsRAT	TMAvsRAT		1	0.01	-4.60517	1	0	0	0	0	0	0	1	0	0	0	0
Jarre	43.1972	5.36461	LIG	EEUvsRAT		PMUvsRAT		HTUvsRAT	TMAvsRAT		1	0.1794	-1.71814	0	0	0	0	0	0	0	1	0	0	0	0
Riou	43.1757	5.38846	LIG	EEUvsRAT		PMUvsRAT		HTUvsRAT	TMAvsRAT		1	0.9032	-0.101811	0	0	0	0	0	0	0	1	0	0	0	0
Grand Rouveau	43.0806	5.76761	LIG	EEUvsRAT		PMUvsRAT		HTUvsRAT	TMAvsRAT		1	0.92	-0.0833816	1	0	0	0	0	0	0	1	0	0	0	0
Redonne	43.0425	6.09812	LIG	EEUvsRAT		PMUvsRAT		HTUvsRAT	TMAvsRAT		0	0.0041	-5.49677	0	0	0	0	0	0	0	1	0	0	0	0
Longue	43.0413	6.09099	LIG	EEUvsRAT		PMUvsRAT		HTUvsRAT	TMAvsRAT		0	0.0125	-4.38203	0	0	0	0	0	0	0	1	0	0	0	0
Petit Ribaud	43.0233	6.14709	LIG	EEUvsRAT		PMUvsRAT		HTUvsRAT	TMAvsRAT		0	0.0069	-4.97623	0	0	0	0	0	0	0	1	0	0	0	0
Île du Levant	43.0226	6.45585	LIG	EEUvsRAT		PMUvsRAT		HTUvsRAT	TMAvsRAT		1	9	2.19722	1	0	0	0	0	0	0	1	0	0	0	0
Grand Ribaud	43.0192	6.14308	LIG	EEUvsRAT		PMUvsRAT		HTUvsRAT	TMAvsRAT		1	0.165	-1.80181	0	0	0	0	0	0	0	1	0	0	0	0
Rocher du Rascas	43.0146	6.38904	LIG	EEUvsRAT		PMUvsRAT		HTUvsRAT	TMAvsRAT		0	0.0045	-5.40368	1	0	0	0	0	0	0	1	0	0	0	0
Bagaud	43.0133	6.36271	LIG	EEUvsRAT		PMUvsRAT		HTUvsRAT	TMAvsRAT		1	0.45	-0.798508	1	0	0	0	0	0	0	1	0	0	0	0
Langoustier	43.0044	6.16158	LIG	EEUvsRAT		PMUvsRAT		HTUvsRAT	TMAvsRAT		1	0.0192	-3.95284	0	0	0	0	0	0	0	1	0	0	0	0
Port-Cros	43.0034	6.39861	LIG	EEUvsRAT		PMUvsRAT		HTUvsRAT	TMAvsRAT		1	7	1.94591	1	0	0	1	0	0	0	1	0	0	0	0
Porquerolles	42.999	6.22051	LIG	EEUvsRAT		PMUvsRAT		HTUvsRAT	TMAvsRAT		1	12.5	2.52573	1	0	1	1	0	0	0	1	0	0	0	0
Gabinière	42.9884	6.39516	LIG	EEUvsRAT		PMUvsRAT		HTUvsRAT	TMAvsRAT		0	0.0291	-3.53702	1	0	0	0	0	0	0	1	0	0	0	0
Corsica	42.1733	9.17007	TYR1	EEUvsRAT		PTIvsRAT	HVI/PSIvsRAT	HTUvsRAT	TMAvsRAT	AFI/ABEvsRAT	1	8680	9.06878	1	1	1	1	0	0	1	0	0	1	1	1
Sardinia	40.0917	9.05144	TYR1	EEUvsRAT	COCvsRAT	PTIvsRAT	HVI/PSIvsRAT	HTUvsRAT	TMAvsRAT	AFI/ABEvsRAT	1	24090	10.0896	1	1	1	1	0	0	1	0	1	1	1	1
Gargalu	42.37	8.53962	TYR1	EEUvsRAT		PTIvsRAT	HVI/PSIvsRAT	HTUvsRAT	TMAvsRAT	AFI/ABEvsRAT	1	0.211	-1.5559	1	1	0	0	0	0	1	0	0	0	0	1
Forana	41.5609	9.37231	TYR1	EEUvsRAT		PTIvsRAT	HVI/PSIvsRAT	HTUvsRAT	TMAvsRAT	AFI/ABEvsRAT	1	0.16	-1.83258	1	1	0	0	0	0	1	0	0	0	0	0
de Vacca	41.5564	9.38707	TYR1	EEUvsRAT		PTIvsRAT	HVI/PSIvsRAT	HTUvsRAT	TMAvsRAT	AFI/ABEvsRAT	0	0.0048	-5.33914	1	1	0	0	0	0	0	0	0	0	0	0
Maestro Maria	41.5556	9.36633	TYR1	EEUvsRAT		PTIvsRAT	HVI/PSIvsRAT	HTUvsRAT	TMAvsRAT	AFI/ABEvsRAT	1	0.0282	-3.56843	1	1	0	0	0	0	0	0	0	0	0	0
I Piana (Cerbicale)	41.5507	9.3618	TYR1	EEUvsRAT		PTIvsRAT	HVI/PSIvsRAT	HTUvsRAT	TMAvsRAT	AFI/ABEvsRAT	1	0.18	-1.7148	1	1	0	0	0	0	1	0	0	0	0	0
Folaca	41.5486	9.31498	TYR1	EEUvsRAT		PTIvsRAT	HVI/PSIvsRAT	HTUvsRAT	TMAvsRAT	AFI/ABEvsRAT	1	0.004	-5.52146	1	0	0	0	0	0	0	0	0	0	0	1
Pietricaggiosa	41.5406	9.35329	TYR1	EEUvsRAT		PTIvsRAT	HVI/PSIvsRAT	HTUvsRAT	TMAvsRAT	AFI/ABEvsRAT	1	0.05	-2.99573	1	1	0	0	0	0	0	0	0	0	0	0
Toro Grande	41.5094	9.38162	TYR1	EEUvsRAT		PTIvsRAT	HVI/PSIvsRAT	HTUvsRAT	TMAvsRAT	AFI/ABEvsRAT	1	0.0162	-4.12274	1	1	0	1	0	0	0	0	0	0	0	0
Fazzuolo Grande	41.3934	9.13444	TYR1	EEUvsRAT		PTIvsRAT	HVI/PSIvsRAT	HTUvsRAT	TMAvsRAT	AFI/ABEvsRAT	1	0.01213	-4.41207	1	1	0	0	0	0	0	0	0	0	0	0
Porraggia	41.392	9.2633	TYR1	EEUvsRAT		PTIvsRAT	HVI/PSIvsRAT	HTUvsRAT	TMAvsRAT	AFI/ABEvsRAT	0	0.01	-4.60517	1	1	0	0	0	0	0	0	0	0	0	0
Ratino	41.3758	9.24634	TYR1	EEUvsRAT		PTIvsRAT	HVI/PSIvsRAT	HTUvsRAT	TMAvsRAT	AFI/ABEvsRAT	1	0.04	-3.21888	1	1	0	0	0	0	0	0	0	0	0	0
Piana de Cavallo	41.3723	9.229	TYR1	EEUvsRAT		PTIvsRAT	HVI/PSIvsRAT	HTUvsRAT	TMAvsRAT	AFI/ABEvsRAT	1	0.07	-2.65926	0	0	0	0	0	0	0	0	0	0	0	0
Sperduto Grande	41.37	9.30529	TYR1	EEUvsRAT		PTIvsRAT	HVI/PSIvsRAT	HTUvsRAT	TMAvsRAT	AFI/ABEvsRAT	0	0.01	-4.60517	1	0	0	0	0	0	0	0	0	0	0	0
Cavallo	41.3682	9.2635	TYR1	EEUvsRAT		PTIvsRAT	HVI/PSIvsRAT	HTUvsRAT	TMAvsRAT	AFI/ABEvsRAT	1	1.43	0.357674	1	1	0	0	0	0	1	0	0	0	0	0
San Bainso	41.3611	9.26065	TYR1	EEUvsRAT		PTIvsRAT	HVI/PSIvsRAT	HTUvsRAT	TMAvsRAT	AFI/ABEvsRAT	1	0.02	-3.91202	0	0	0	0	0	0	0	0	0	0	0	0
Lavezzi	41.3388	9.2583	TYR1	EEUvsRAT		PTIvsRAT	HVI/PSIvsRAT	HTUvsRAT	TMAvsRAT	AFI/ABEvsRAT	1	0.72937	-0.315574	1	1	0	0	0	0	1	0	0	0	0	0
Razzoli	41.3002	9.34982	TYR1	EEUvsRAT	COCvsRAT	PTIvsRAT	HVI/PSIvsRAT	HTUvsRAT	TMAvsRAT	AFI/ABEvsRAT	1	1.9	0.641854	1	1	1	0	0	0	1	0	1	0	0	1
Santa Maria (Sardinia)	41.2976	9.37403	TYR1	EEUvsRAT	COCvsRAT	PTIvsRAT	HVI/PSIvsRAT	HTUvsRAT	TMAvsRAT	AFI/ABEvsRAT	1	2.01	0.698135	1	1	1	1	0	0	1	0	1	0	1	1
Corcelli	41.2947	9.40027	TYR1	EEUvsRAT	COCvsRAT	PTIvsRAT	HVI/PSIvsRAT	HTUvsRAT	TMAvsRAT	AFI/ABEvsRAT	1	0.15	-1.89712	1	1	0	0	0	0	1	0	0	0	0	0
Carpa	41.2876	9.36235	TYR1	EEUvsRAT	COCvsRAT	PTIvsRAT	HVI/PSIvsRAT	HTUvsRAT	TMAvsRAT	AFI/ABEvsRAT	1	0.004137	-5.48778	0	1	0	0	0	0	0	0	0	0	0	0
Barrettini	41.2841	9.40156	TYR1	EEUvsRAT	COCvsRAT	PTIvsRAT	HVI/PSIvsRAT	HTUvsRAT	TMAvsRAT	AFI/ABEvsRAT	0	0.12	-2.12026	1	1	0	0	0	0	0	0	0	0	0	0
Stramanari Occidentale	41.284	9.36286	TYR1	EEUvsRAT	COCvsRAT	PTIvsRAT	HVI/PSIvsRAT	HTUvsRAT	TMAvsRAT	AFI/ABEvsRAT	1	0.002779	-5.88566	1	0	0	0	0	0	0	0	0	0	0	0
Budelli	41.2837	9.35038	TYR1	EEUvsRAT	COCvsRAT	PTIvsRAT	HVI/PSIvsRAT	HTUvsRAT	TMAvsRAT	AFI/ABEvsRAT	1	1.84	0.609766	1	1	1	0	0	0	1	0	1	0	1	1
Stramanari Orientale	41.2835	9.36509	TYR1	EEUvsRAT	COCvsRAT	PTIvsRAT	HVI/PSIvsRAT	HTUvsRAT	TMAvsRAT	AFI/ABEvsRAT	1	0.001442	-6.54172	1	0	0	0	0	0	0	0	0	0	0	0
Spargiotto	41.2504	9.32325	TYR1	EEUvsRAT	COCvsRAT	PTIvsRAT	HVI/PSIvsRAT	HTUvsRAT	TMAvsRAT	AFI/ABEvsRAT	0	0.12	-2.12026	1	1	0	0	0	0	0	0	1	0	0	0
Spargi	41.2422	9.35015	TYR1	EEUvsRAT	COCvsRAT	PTIvsRAT	HVI/PSIvsRAT	HTUvsRAT	TMAvsRAT	AFI/ABEvsRAT	1	4.67	1.54116	1	1	1	0	0	0	1	0	1	0	1	1
La Maddalena	41.2321	9.41124	TYR1	EEUvsRAT	COCvsRAT	PTIvsRAT	HVI/PSIvsRAT	HTUvsRAT	TMAvsRAT	AFI/ABEvsRAT	1	20.1	3.00072	1	1	1	1	0	0	1	0	1	1	1	1
Caprera	41.2073	9.46476	TYR1	EEUvsRAT	COCvsRAT	PTIvsRAT	HVI/PSIvsRAT	HTUvsRAT	TMAvsRAT	AFI/ABEvsRAT	1	15.7	2.75366	1	1	1	1	0	0	1	0	1	1	1	1
Li Nibani	41.1264	9.56622	TYR1	EEUvsRAT	COCvsRAT	PTIvsRAT	HVI/PSIvsRAT	HTUvsRAT	TMAvsRAT	AFI/ABEvsRAT	1	0.09	-2.40795	1	1	0	0	0	0	0	0	0	0	0	0
Asinara	41.077	8.30873	TYR1	EEUvsRAT	COCvsRAT	PTIvsRAT	HVI/PSIvsRAT	HTUvsRAT	TMAvsRAT	AFI/ABEvsRAT	1	51	3.93183	1	1	1	1	0	0	1	0	1	1	1	0
Mortorio	41.0756	9.60239	TYR1	EEUvsRAT	COCvsRAT	PTIvsRAT	HVI/PSIvsRAT	HTUvsRAT	TMAvsRAT	AFI/ABEvsRAT	1	0.67	-0.400478	1	1	0	0	0	0	1	0	1	0	0	0
Camere Orientale	41.0697	9.58627	TYR1	EEUvsRAT	COCvsRAT	PTIvsRAT	HVI/PSIvsRAT	HTUvsRAT	TMAvsRAT	AFI/ABEvsRAT	1	0.07	-2.65926	0	1	0	0	0	0	0	0	1	0	0	0
Camere Occidentale	41.0684	9.58155	TYR1	EEUvsRAT	COCvsRAT	PTIvsRAT	HVI/PSIvsRAT	HTUvsRAT	TMAvsRAT	AFI/ABEvsRAT	1	0.05	-2.99573	1	1	0	0	0	0	0	0	1	0	0	0
Soffi	41.0638	9.57535	TYR1	EEUvsRAT	COCvsRAT	PTIvsRAT	HVI/PSIvsRAT	HTUvsRAT	TMAvsRAT	AFI/ABEvsRAT	1	0.54	-0.616186	1	1	0	0	0	0	1	0	1	0	0	0
Rossa di Trinità	41.0143	8.86334	TYR1	EEUvsRAT	COCvsRAT	PTIvsRAT	HVI/PSIvsRAT	HTUvsRAT	TMAvsRAT	AFI/ABEvsRAT	1	0.05	-2.99573	1	1	0	0	0	0	0	0	0	0	0	1
Figarolo	40.9805	9.64351	TYR1	EEUvsRAT	COCvsRAT	PTIvsRAT	HVI/PSIvsRAT	HTUvsRAT	TMAvsRAT	AFI/ABEvsRAT	1	0.38	-0.967584	1	1	0	0	0	0	1	0	1	0	1	0
Tavolara	40.9058	9.71116	TYR1	EEUvsRAT	COCvsRAT	PTIvsRAT	HVI/PSIvsRAT	HTUvsRAT	TMAvsRAT	AFI/ABEvsRAT	1	5.9	1.77495	1	1	0	1	0	0	1	0	1	1	1	0
Topi	40.8968	9.67473	TYR1	EEUvsRAT	COCvsRAT	PTIvsRAT	HVI/PSIvsRAT	HTUvsRAT	TMAvsRAT	AFI/ABEvsRAT	0	0.003355	-5.6973	1	0	0	0	0	0	0	0	0	0	0	0
Porri	40.8804	8.21306	TYR1	EEUvsRAT	COCvsRAT	PTIvsRAT	HVI/PSIvsRAT	HTUvsRAT	TMAvsRAT	AFI/ABEvsRAT	0	0.04	-3.21888	0	1	0	0	0	0	0	0	0	0	0	0
Molarotto	40.8747	9.77819	TYR1	EEUvsRAT	COCvsRAT	PTIvsRAT	HVI/PSIvsRAT	HTUvsRAT	TMAvsRAT	AFI/ABEvsRAT	0	0.03	-3.50656	1	1	0	0	0	0	0	0	0	0	0	0
Molara	40.8686	9.72733	TYR1	EEUvsRAT	COCvsRAT	PTIvsRAT	HVI/PSIvsRAT	HTUvsRAT	TMAvsRAT	AFI/ABEvsRAT	1	3.92	1.36609	1	1	0	0	0	0	1	0	1	1	1	0
Piana de Alghero	40.6041	8.14105	TYR1	EEUvsRAT	COCvsRAT	PTIvsRAT	HVI/PSIvsRAT	HTUvsRAT	TMAvsRAT	AFI/ABEvsRAT	1	0.14	-1.96611	1	1	0	0	0	0	0	0	0	0	0	0
Foradada	40.5705	8.15105	TYR1	EEUvsRAT	COCvsRAT	PTIvsRAT	HVI/PSIvsRAT	HTUvsRAT	TMAvsRAT	AFI/ABEvsRAT	0	0.05	-2.99573	0	1	0	0	0	0	0	0	0	0	0	0
Mal de Ventre	39.9914	8.30586	TYR1	EEUvsRAT	COCvsRAT	PTIvsRAT	HVI/PSIvsRAT	HTUvsRAT	TMAvsRAT	AFI/ABEvsRAT	0	1	0	1	1	0	0	0	0	1	0	0	1	0	0
Serpentara	39.1406	9.60644	TYR1	EEUvsRAT	COCvsRAT	PTIvsRAT	HVI/PSIvsRAT	HTUvsRAT	TMAvsRAT	AFI/ABEvsRAT	1	0.35	-1.04982	1	1	0	1	0	0	1	0	0	0	0	0
Cavoli	39.0862	9.53122	TYR1	EEUvsRAT	COCvsRAT	PTIvsRAT	HVI/PSIvsRAT	HTUvsRAT	TMAvsRAT	AFI/ABEvsRAT	1	0.48	-0.733969	1	1	1	0	0	0	1	0	0	0	0	0
Vacca	38.9365	8.44926	TYR1	EEUvsRAT	COCvsRAT	PTIvsRAT	HVI/PSIvsRAT	HTUvsRAT	TMAvsRAT	AFI/ABEvsRAT	1	0.11	-2.20727	1	0	0	0	0	0	1	0	1	0	0	0
Toro (Sardinia)	38.8613	8.40965	TYR1	EEUvsRAT	COCvsRAT	PTIvsRAT	HVI/PSIvsRAT	HTUvsRAT	TMAvsRAT	AFI/ABEvsRAT	0	0.11	-2.20727	1	1	0	1	0	0	0	0	0	0	0	0
Mezzu Mare	41.8774	8.59235	TYR1	EEUvsRAT		PTIvsRAT	HVI/PSIvsRAT	HTUvsRAT	TMAvsRAT	AFI/ABEvsRAT	1	0.372	-0.988861	1	1	0	0	0	0	1	0	0	0	0	0
Fazzuolo Piccolo	41.3934	9.13444	TYR1	EEUvsRAT		PTIvsRAT	HVI/PSIvsRAT	HTUvsRAT	TMAvsRAT	AFI/ABEvsRAT	0	0.0024	-6.03229	1	1	0	0	0	0	0	0	0	0	0	0
Grand îlot des Bruzzi	41.4604	9.02072	TYR1	EEUvsRAT		PTIvsRAT	HVI/PSIvsRAT	HTUvsRAT	TMAvsRAT	AFI/ABEvsRAT	1	0.00888	-4.72395	1	1	0	0	0	0	0	0	0	0	0	0
Saint Antoine	41.365	9.18029	TYR1	EEUvsRAT		PTIvsRAT	HVI/PSIvsRAT	HTUvsRAT	TMAvsRAT	AFI/ABEvsRAT	0	0.00607	-5.1044	0	0	0	0	0	0	0	0	0	0	0	0
Senetosa	41.5661	8.78354	TYR1	EEUvsRAT		PTIvsRAT	HVI/PSIvsRAT	HTUvsRAT	TMAvsRAT	AFI/ABEvsRAT	1	0.02885	-3.54565	1	1	0	0	0	0	0	0	0	0	0	0
Spano	42.6008	8.7995	TYR1	EEUvsRAT		PTIvsRAT	HVI/PSIvsRAT	HTUvsRAT	TMAvsRAT	AFI/ABEvsRAT	1	0.023	-3.77226	0	1	0	0	0	0	0	0	0	0	0	0
Giraglia	43.0255	9.40661	TYR1	EEUvsRAT		PTIvsRAT	HVI/PSIvsRAT	HTUvsRAT	TMAvsRAT	AFI/ABEvsRAT	1	0.09645	-2.33873	1	1	1	0	0	0	1	0	0	0	0	0
Finocchiarola	42.9838	9.47085	TYR1	EEUvsRAT		PTIvsRAT	HVI/PSIvsRAT	HTUvsRAT	TMAvsRAT	AFI/ABEvsRAT	1	0.0148	-4.21313	1	0	1	0	0	0	1	0	0	0	0	0
Mezzana	42.9844	9.46872	TYR1	EEUvsRAT		PTIvsRAT	HVI/PSIvsRAT	HTUvsRAT	TMAvsRAT	AFI/ABEvsRAT	1	0.0079	-4.84089	1	0	0	0	0	0	1	0	0	0	0	0
Toro Piccolo	41.508	9.38049	TYR1	EEUvsRAT		PTIvsRAT	HVI/PSIvsRAT	HTUvsRAT	TMAvsRAT	AFI/ABEvsRAT	0	0.0051	-5.27851	1	1	0	0	0	0	0	0	0	0	0	0
1erRocher Toro Piccolo	41.508	9.38049	TYR1	EEUvsRAT		PTIvsRAT	HVI/PSIvsRAT	HTUvsRAT	TMAvsRAT	AFI/ABEvsRAT	0	0.0011	-6.81245	1	0	0	0	0	0	0	0	0	0	0	0
2emeRocher Toro Piccolo	41.508	9.38049	TYR1	EEUvsRAT		PTIvsRAT	HVI/PSIvsRAT	HTUvsRAT	TMAvsRAT	AFI/ABEvsRAT	0	0.0006	-7.41858	1	0	0	0	0	0	0	0	0	0	0	0
La Folachedda	41.5505	9.3159	TYR1	EEUvsRAT		PTIvsRAT	HVI/PSIvsRAT	HTUvsRAT	TMAvsRAT	AFI/ABEvsRAT	1	0.0009	-7.01312	0	0	0	0	0	0	0	0	0	0	0	0
Rocher au NO de la Folachedda	41.5505	9.3159	TYR1	EEUvsRAT		PTIvsRAT	HVI/PSIvsRAT	HTUvsRAT	TMAvsRAT	AFI/ABEvsRAT	1	0.00021	-8.4684	0	0	0	0	0	0	0	0	0	0	0	0
Palazzu	42.3805	8.54652	TYR1	EEUvsRAT		PTIvsRAT	HVI/PSIvsRAT	HTUvsRAT	TMAvsRAT	AFI/ABEvsRAT	0	0.00572	-5.16379	1	0	0	0	0	0	0	0	0	0	0	0
Luigi Giafferri	41.3498	9.25581	TYR1	EEUvsRAT		PTIvsRAT	HVI/PSIvsRAT	HTUvsRAT	TMAvsRAT	AFI/ABEvsRAT	1	0.02594	-3.65197	1	1	0	0	0	0	0	0	0	0	0	0
Giacinto Paoli	41.3485	9.25546	TYR1	EEUvsRAT		PTIvsRAT	HVI/PSIvsRAT	HTUvsRAT	TMAvsRAT	AFI/ABEvsRAT	1	0.02391	-3.73346	1	1	0	0	0	0	1	0	0	0	0	0
Silene	41.3469	9.2555	TYR1	EEUvsRAT		PTIvsRAT	HVI/PSIvsRAT	HTUvsRAT	TMAvsRAT	AFI/ABEvsRAT	1	0.0064	-5.05146	1	1	0	0	0	0	0	0	0	0	0	0
Gian Pietro Gaffori	41.3488	9.25783	TYR1	EEUvsRAT		PTIvsRAT	HVI/PSIvsRAT	HTUvsRAT	TMAvsRAT	AFI/ABEvsRAT	1	0.00422	-5.46792	0	0	0	0	0	0	0	0	0	0	0	0
Pasquale Paoli	41.3489	9.25083	TYR1	EEUvsRAT		PTIvsRAT	HVI/PSIvsRAT	HTUvsRAT	TMAvsRAT	AFI/ABEvsRAT	1	0.02109	-3.85896	1	0	0	0	0	0	0	0	0	0	0	0
Cala della Chiesa	41.345	9.25198	TYR1	EEUvsRAT		PTIvsRAT	HVI/PSIvsRAT	HTUvsRAT	TMAvsRAT	AFI/ABEvsRAT	1	0.0097	-4.63563	1	0	0	0	0	0	0	0	0	0	0	0
Andrea Ceccaldi	41.3386	9.24936	TYR1	EEUvsRAT		PTIvsRAT	HVI/PSIvsRAT	HTUvsRAT	TMAvsRAT	AFI/ABEvsRAT	1	0.01556	-4.16305	1	1	0	0	0	0	0	0	0	0	0	0
Cala di Giunco	41.3366	9.25285	TYR1	EEUvsRAT		PTIvsRAT	HVI/PSIvsRAT	HTUvsRAT	TMAvsRAT	AFI/ABEvsRAT	1	0.00732	-4.91714	1	0	0	0	0	0	0	0	0	0	0	0
La Semillante	41.3367	9.24828	TYR1	EEUvsRAT		PTIvsRAT	HVI/PSIvsRAT	HTUvsRAT	TMAvsRAT	AFI/ABEvsRAT	1	0.0325	-3.42652	1	1	0	0	0	0	0	0	0	0	0	0
Capraia	43.0343	9.81862	TYR2	EEUvsRAT		PMUvsRAT	HVI/PSIvsRAT	HTUvsRAT	TMAvsRAT		1	19	2.94444	1	0	1	1	0	0	1	0	0	1	0	0
La Peraiola	43.0319	9.79657	TYR2	EEUvsRAT		PMUvsRAT	HVI/PSIvsRAT	HTUvsRAT	TMAvsRAT		1	0.01	-4.60517	0	0	0	0	0	0	0	0	0	1	0	0
Palmaiola	42.8658	10.4751	TYR2	EEUvsRAT		PMUvsRAT	HVI/PSIvsRAT	HTUvsRAT	TMAvsRAT		1	0.7	-0.356675	1	0	0	1	0	0	0	1	0	0	0	0
Elba	42.7758	10.2081	TYR2	EEUvsRAT		PMUvsRAT	HVI/PSIvsRAT	HTUvsRAT	TMAvsRAT		1	224	5.41165	1	0	1	1	0	0	1	1	0	1	0	0
La Scola	42.5838	10.1063	TYR2	EEUvsRAT		PMUvsRAT	HVI/PSIvsRAT	HTUvsRAT	TMAvsRAT		1	0.016	-4.13517	1	0	0	0	0	0	0	1	0	0	0	0
Pianosa	42.5828	10.0783	TYR2	EEUvsRAT		PMUvsRAT	HVI/PSIvsRAT	HTUvsRAT	TMAvsRAT		1	10.3	2.33214	1	0	1	1	0	0	1	1	0	1	0	0
Isolotto di Port' Ercole	42.3814	11.2107	TYR2	EEUvsRAT		PMUvsRAT	HVI/PSIvsRAT	HTUvsRAT	TMAvsRAT		1	0.07	-2.65926	1	0	0	0	0	0	0	1	0	0	0	0
Giglio	42.3537	10.9043	TYR2	EEUvsRAT		PMUvsRAT	HVI/PSIvsRAT	HTUvsRAT	TMAvsRAT		1	23.8	3.16969	1	0	1	1	0	0	1	0	0	1	0	0
Montecristo	42.3345	10.3106	TYR2	EEUvsRAT		PMUvsRAT	HVI/PSIvsRAT	HTUvsRAT	TMAvsRAT		0	10.4	2.34181	1	0	0	1	0	0	1	0	0	1	0	0
Giannutri	42.2528	11.1009	TYR2	EEUvsRAT		PMUvsRAT	HVI/PSIvsRAT	HTUvsRAT	TMAvsRAT		1	2.88	1.05779	1	0	1	1	0	0	1	0	0	1	0	0
Ilot des Chiens	37.5578	8.95574	TUN	EEUvsRAT				HTUvsRAT			1	0.1	-2.30259	1	0	0	0	0	0	0	0	1	0	0	0
La Galite	37.5282	8.93835	TUN	EEUvsRAT				HTUvsRAT			1	8.02	2.08194	1	0	0	1	0	0	0	0	1	0	0	0
				PLI = Podarcis lilfordi
				PPI = Podarcis pityusensis
				EEU = Euleptes europaea
				COC = Chalcides ocellatus
				PMU = Podarcis muralis
				PTI = Podarcis tiliguerta
				PSI = Podarcis siculus
				HVI = Hierophis viridiflavus
				HTU = Hemidactylus turcicus
				TMA = Tarentola mauritanica
				AFI = Algyroides fitzingeri
				ABE = Archaeolacerta bedriagae
				RAT = Rattus rattus
